# Supplementary material
Source: HighWire-hosted journal article supplement (https://ard.bmj.com/content/76/8/1458)
Supplement: inline-supplementary-material-2 [file inline-supplementary-material-2.xlsx]

## Sheet: TableS1a
probeid

## Sheet: TableS1b
probeid
