# Supplementary material
Source: HighWire-hosted journal article supplement (https://ard.bmj.com/content/76/8/1458)
Supplement: inline-supplementary-material-3 [file inline-supplementary-material-3.xlsx]

## Sheet: TableS3a
analysis_category

## Sheet: TableS3b
analysis_category

## Sheet: TableS3c
analysis_category

## Sheet: TableS3d
analysis_category

## Sheet: TableS3e
analysis_category

## Sheet: TableS3f
analysis_category

## Sheet: TableS3g
analysis_category

## Sheet: TableS3h
analysis_category
